# Supplementary material for: Hydrated vanadium pentoxide with superior sodium storage capacity
Source: Royal Society of Chemistry journal article supplement (doi:10.1039/c5ta00502g), 2015-01-01
Supplement: c5ta00502g1.pdf [file c5ta00502g1.pdf]

*Supporting information*

**Hydrated vanadium pentoxide xerogel with superior sodium  
storage capacity**

Qiulong Wei,<sup>‡a</sup> Jin Liu,<sup>‡a</sup> Wei Feng,<sup>‡a</sup> Jinzhi Sheng,<sup>a</sup> Xiacong Tian,<sup>a</sup> Liang He,<sup>\*a</sup>  
Qinyou An<sup>b</sup> and Liqiang Mai<sup>\*a</sup>

<sup>a</sup> State Key Laboratory of Advanced Technology for Materials Synthesis and  
Processing, Wuhan University of Technology, Hubei, Wuhan 430070, China

E-mail: mlq518@whut.edu.cn; hel@whut.edu.cn

Fax: +86-27-87644867; Tel: +86-27-87467595

<sup>b</sup> Cullen College of Engineering, Department of Electrical & Computer  
Engineering, University of Houston, Houston, USA

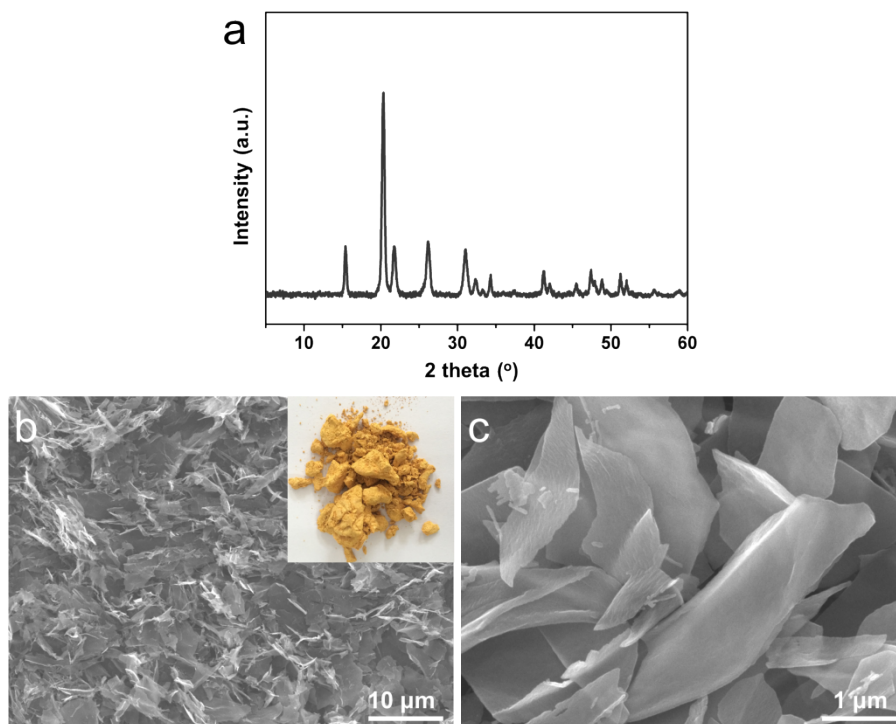

**Fig. S1** XRD pattern (a) and SEM images (b,c) of the orthorhombic  $V_2O_5$ . Inset of b is the optical image of as-synthesized  $\alpha$ - $V_2O_5$  powders. (JCPDS No. 00-041-1426, space group: Pmmn,  $a = 11.5160 \text{ \AA}$ ,  $b = 3.5656 \text{ \AA}$ ,  $c = 4.3727 \text{ \AA}$ ).

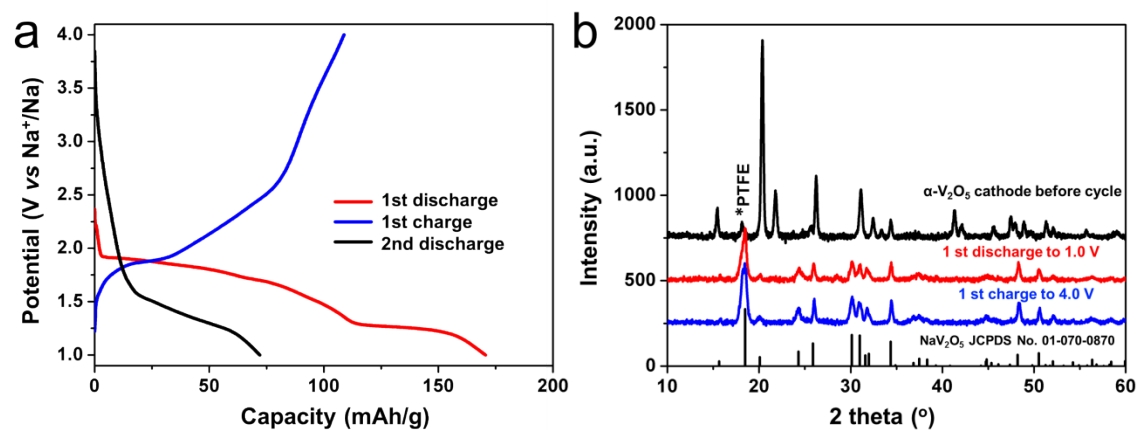

**Fig. S2** (a) The discharge-charge curves of the  $\alpha$ - $V_2O_5$  cathode in SIB test. The 1st discharge curve displays two plateaus. However, the 2nd discharge curve display one main plateau, which indicating the irreversible phase transition occurs during the first cycle, which resulting the large capacity fading. (b) The ex-situ XRD patterns of  $\alpha$ - $V_2O_5$  cathode at various charge/discharge states. ( $NaV_2O_5$ , JCPDS No. 01-070-0870, space group: P21mn,  $a = 11.3180 \text{ \AA}$ ,  $b = 3.6110 \text{ \AA}$ ,  $c = 4.7970 \text{ \AA}$ ,  $\alpha = \beta = \gamma = 90.0^\circ$ ). The phase transition from the  $\alpha$ - $V_2O_5$  phase to  $NaV_2O_5$  phase is irreversible, which could not be recovered to the  $\alpha$ - $V_2O_5$  phase after charging back to 4.0 V, indicating the phase changes of  $\alpha$ - $V_2O_5$  layer structure are irreversible after the  $Na^+$  ions inserting.

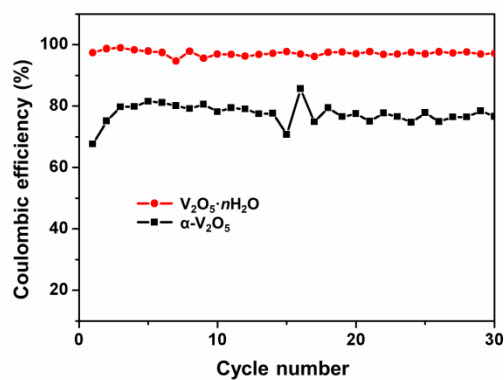

**Fig. S3** Coulombic efficiency vs cycle number of the  $V_2O_5 \cdot nH_2O$  and  $\alpha-V_2O_5$  cathodes in SIB test.

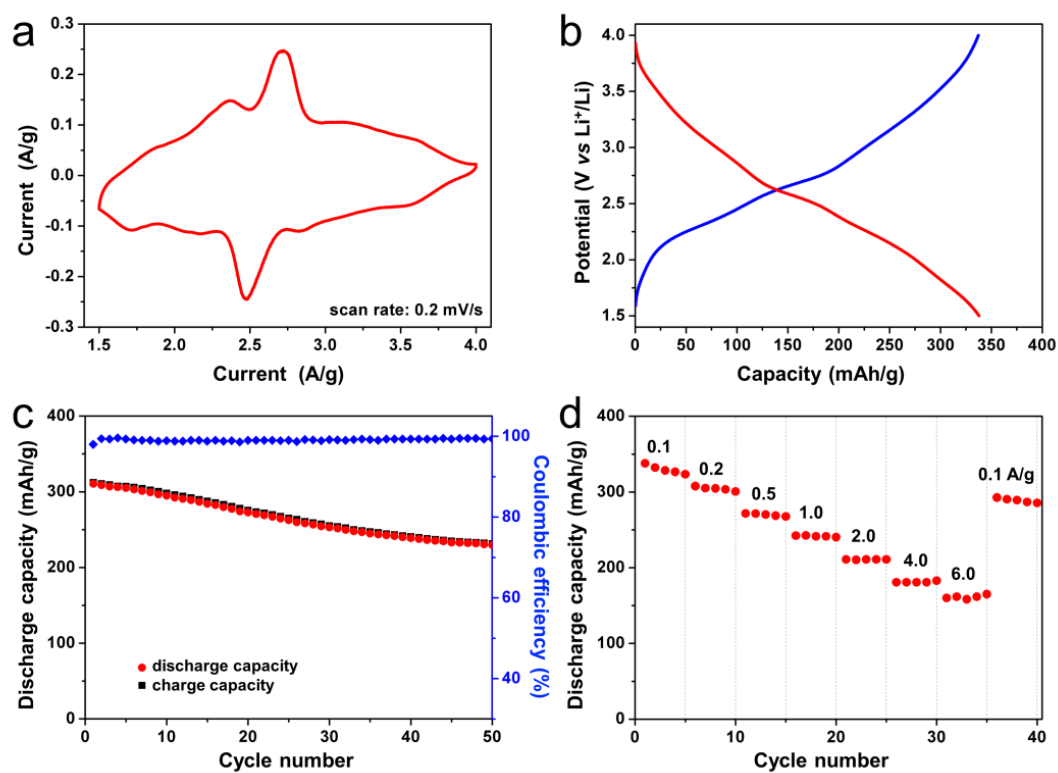

**Fig. S4** LIB performance of the  $V_2O_5 \cdot nH_2O$  cathode. CV curves (a) and discharge-charge curves at current density of 0.1 A/g (b). Cycling performance at the current density of 0.5 A/g (c) and the rate performance (d).

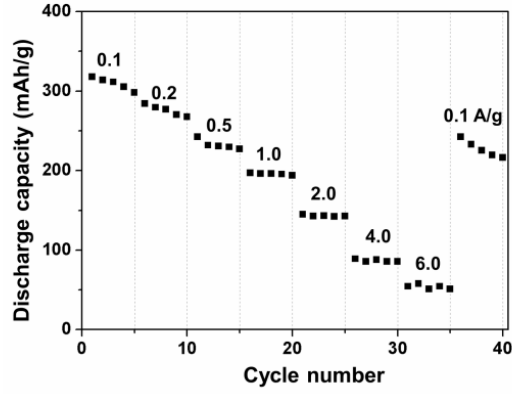

**Fig. S5** LIB rate performance of the  $\alpha$ - $V_2O_5$  cathode.

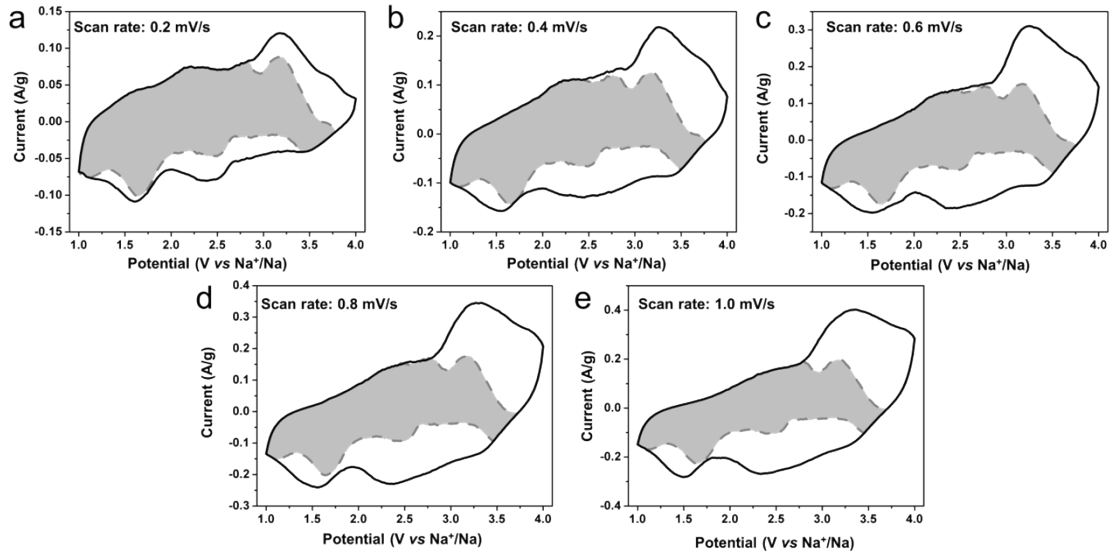

**Fig. S6** Cyclic voltammetric responses  $V_2O_5 \cdot nH_2O$  at scan rate of 0.2 (a), 0.4 (b), 0.6 (c), 0.8 (d) and 1.0 mV/s (e), respectively. The diffusion contribution to the current is represented as the shaded area.

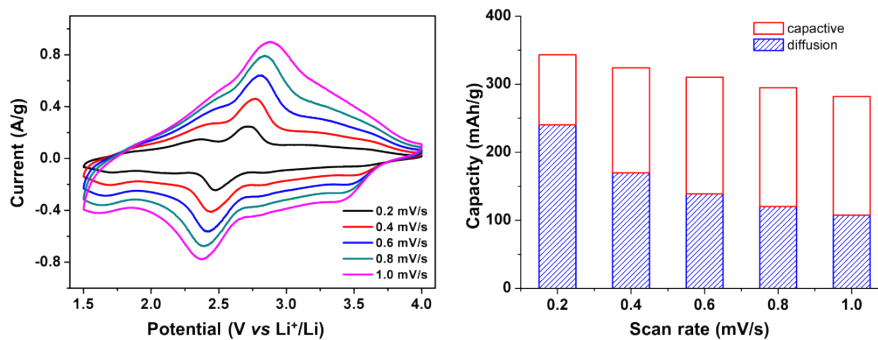

**Fig. S7** CV curves (a) and corresponding capacity contribution (b) of the total stored charge at various scan rates for LIB test.

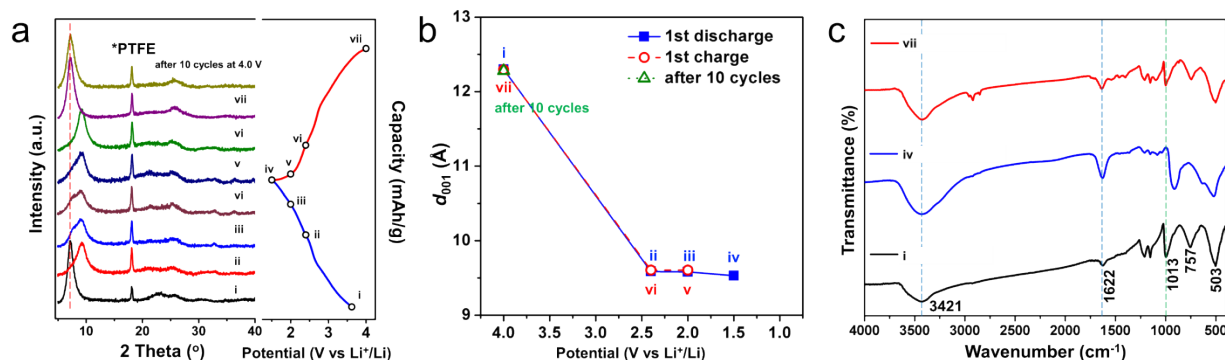

**Fig. S8** *Ex-situ* XRD pattern (a), related  $d_{001}$  value changes (b) and FTIR spectra (c) of the cathodes in LIB test collected at various charge/discharge states: (i) before cycle, (ii) discharged to 2.4 V, (iii) discharged to 2.0 V, (iv) discharged to 1.5 V, (v) re-charged to 2.0 V, (vi) re-charged to 2.4 V and (vii) re-charged to 4.0 V.

**Table S1.** A survey of electrochemical properties of vanadium oxides and their composites for SIBs.

| Electrode description (%)                                 | Potential range (V) | Specific capacity (mAh/g) | High rate capacity      |
|-----------------------------------------------------------|---------------------|---------------------------|-------------------------|
| $V_2O_5 \cdot nH_2O$ xerogels [this work]                 | 1.0-4.0             | 338 mAh/g at 50 mA/g      | 96 mAh/g at 1000 mA/g   |
| bilayered $V_2O_5$ nanobelts [1]                          | 1.0-4.0             | 231.4 mAh/g at 80 mA/g    | 134 mAh/g at 640 mA/g   |
| $V_2O_5$ nanoparticles generated in nanoporous carbon[2]  | 1.5-3.8             | 170 mAh/g at 40 mA/g      | 90 mAh/g at 640 mA/g    |
| nanostructured bilayered vanadium oxide [3]               | 1.5-3.8             | 250 mAh/g at 20 mA/g      | ---                     |
| amorphous vanadium oxide [4]                              | 1.5-3.8             | 241 mAh/g at 23.4 mA/g    | ~80 mAh/g at 1170 mA/g  |
| hierarchical orthorhombic $V_2O_5$ hollow nanospheres [5] | 1.0-4.2             | 230.0 mAh/g at 20 mA/g    | ~90 mAh/g at 1280 mA/g  |
| $V_6O_{13}$ microflowers [6]                              | 1.5-3.4             | 225.7 mAh/g at 20 mA/g    | 159.8 mAh/g at 160 mA/g |
| $VO_2$ nanosheets [7]                                     | 1.5-4               | 220 mAh/g at 50 mA/g      | ~80 mAh/g at 1000 mA/g  |

## References

- [1] D. Su and G. Wang, *ACS Nano*, 2013, **7**, 11218.
- [2] V. Raju, J. Rains, C. Gates, W. Luo, X. Wang, W. F. Stickle, G. D. Stucky and X. Ji, *Nano Lett.*, 2014, **14**, 4119.
- [3] S. Tepavcevic, H. Xiong, V. R. Stamenkovic, X. Zuo, M. Balasubramanian, V. B. Prakapenka, C. S. Johnson and T. Rajh, *ACS Nano*, 2011, **6**, 530.

- [4] E. Uchaker, Y.-Z. Zheng, S. Li, S. L. Candelaria, S. Hu and G. Cao, *J. Mater. Chem. A*, 2014, 2, 18208.
- [5] D. Su, S. X. Dou and G. Wang, *J. Mater. Chem. A*, 2014, 2, 11185.
- [6] H. Fei, Y. Lin and M. Wei, *J. Colloid Interf. Sci.*, 2014, 425, 1.
- [7] W. Wang, B. Jiang, L. Hu, Z. Lin, J. Hou and S. Jiao, *J. Power Sources*, 2014, 250, 181.
